# Supplementary material for: A novel electrochemiluminescence strategy for ultrasensitive DNA assay using luminol functionalized gold nanoparticles multi-labeling and amplification of gold nanoparticles and biotin–streptavidin system
Source: Royal Society of Chemistry journal article supplement (doi:10.1039/c0cc02356f), 2010-01-01
Supplement: c0cc02356f.pdf [file c0cc02356f.pdf]

**Supplementary Material (EIS)**

**A Novel Electrochemiluminescence Strategy for  
Ultrasensitive DNA Assay Using Luminol Functionalized  
Gold Nanoparticles Multi-labeling and Amplification of  
Gold Nanoparticles and Biotin-streptavidin System**

*By Ying Chai, Dayong Tian, Hua Cui\**

## Experimental

**Chemicals and solutions.** A  $\text{HAuCl}_4$  stock solution (2%  $\text{HAuCl}_4$ , w/w) was prepared by dissolving 1.0 g of  $\text{HAuCl}_4 \cdot 4\text{H}_2\text{O}$  (Shanghai Reagent, China) in 412 mL of purified water and stored at 4 °C. Luminol and 1, 3-propanedithiol were purchased from Sigma-Aldrich (USA). Bovine serum albumin(BSA), streptavidin (SA) were obtained from Solarbio (Beijing, China). All DNA used in this work were synthesized and HPLC-purified by sangon Inc. (Shanghai, China). Their sequences and modification are listed in Table 1. A 0.01 M stock solution of luminol was prepared by dissolving luminol in 0.1 M NaOH solution and was kept at 4 °C. All other reagents were of analytical grade. Ultra-pure water was prepared by a Millipore Milli-Q system and used throughout.

**Table 1** DNA Sequences and Modification

| DNA                                | Sequence(5'-3')                                               |
|------------------------------------|---------------------------------------------------------------|
| Capture probe:                     | 5'-biotin-AAAAAAAAAAGACCTAGTCCT<br>TCCAACAGC-3'               |
| Biotinylated DNA for signal probe: | 5'- GGGTTTATGAAAAACACTTT-biotin-3'                            |
| Target ss-DNA:                     | 5'- AAAGTGTTTTTCATAAACCCGCTGTT<br>GGAAGGACTAGGTC-3'           |
| One-base mismatched sequence:      | 5'- AAAGTGTTTTTCATAAACCC <u>T</u> CTGTT<br>GGAAGGACTAGGTC-3'  |
| Two-based mismatched sequence:     | 5'- AAAGTGTTTTTCATAAACCA <u>AT</u> CTGTT<br>GGAAGGACTAGGTC-3' |
| Non-complementary sequence:        | 5'- AAAGTGTTTTTCATAAACCCACTGCT<br>AGAGATTTTCACTA-3'           |

**Preparation of luminol-AuNPs labeled DNA signal probe.** The luminol-AuNPs with a diameter of 20 nm were prepared by reducing  $\text{AuCl}_4^-$  ions with 0.01 M luminol

solution and stored at 4 °C as described previously.<sup>14</sup> The unreacted reagents and the resulted products (small molecules) were removed via dialysis for 2 days with ultrapure water about six times under stirring by use of a 3500 molecular weight cutoff dialysis membrane to obtain luminol-AuNPs. 1 mL pH-adjusted (pH 8.0) luminol-AuNPs solution was added to 25  $\mu$ L of SA (1.0 mg/mL), after incubated at room temperature for 0.5 h, the solution was further added with 5 % BSA solution to the final concentration of 1 % BSA, then stirred for 5 min. The conjugate of luminol-AuNPs with SA was centrifuged at 12500 rpm for 20 min (Universal 320, Hettich, Germany), and the red precipitates were dispersed with 0.05 M pH 8.0 Tris-HCl containing 0.3 M NaCl. Biotinylated DNA ( $4 \times 10^{-7}$  M, optimized concentration) was added to the red solution and incubated at 37 °C for 1 h. The as-prepared mixture was centrifuged at 12500 rpm for 10 min, and the red precipitates were suspended with 0.05 M pH 8.0 Tris-HCl containing 0.3 M NaCl to obtain luminol-AuNPs labeled DNA signal probe.

**Fabrication of sandwich-type DNA conjugate modified electrode.** 60  $\mu$ L aliquots of the biotinylated DNA capture probe ( $4 \times 10^{-6}$  M) was dropped with a pipette on the SA coated AuNPs modified electrode at 37 °C for 1 h and rinsed by washing buffer (7 mM pH 8.0 Tris-HCl containing 0.17 M NaCl) to remove the absorbed DNA capture probe. Then 60  $\mu$ L aliquots of the 1%(w/w) BSA in 0.05 M pH 8.0 Tris-HCl was dropped with a pipette on the SA coated AuNPs modified electrode to block both the electrode and AuNPs, the electrode was incubated at 37 °C for 30 min and rinsed with washing buffer. After that, 60  $\mu$ L aliquots of target ss-DNA were

dropped with a pipette on the modified electrode at 37 °C for 1 h and rinsed with washing buffer. Finally, 60  $\mu$ L aliquots of the luminol-AuNPs labeled DNA signal probe were dropped with a pipette on the modified electrode at 37 °C for 1 h and rinsed with washing buffer. The gold electrode modified with the “sandwich-type” DNA conjugate was ready for further experiments.

**ECL measurement.** ECL measurements were carried out with a homemade ECL system consisted of a model CHI760B workstation (Chenhua, Shanghai, China), a model RFL-1 luminometer (Remax, Xi’an, China), an H-type electrochemical cell (self-designed) and a computer. A three electrode system was used, being composed of a disk gold electrode ( $\Phi=5$  mm) modified with the “sandwich-type” DNA conjugate as working electrode, a platinum wire as counter electrode, and a silver wire as the quasi-reference electrode (AgQRE). A 1.0 mM  $\text{H}_2\text{O}_2$  solution containing 0.02 M carbonate buffer solution (CBS, pH 9.95) was used as working solution for the detection of target ss-DNA. During measurements, a 3.0 mL portion of the working solution and blank solution without  $\text{H}_2\text{O}_2$  were added to the working compartment and the auxiliary compartment of the ECL cell, respectively. When a double-step potential (30 s pulse period, 0.1 s pulse time, 0.8 V pulse potential and 0 V initial pulse potential) was applied to the working electrode, an ECL signal was generated and recorded.

**Scanning Electron Micrograph (SEM) analysis.** For the SEM analysis, the modified gold electrodes were dried under an infrared lamp and measured by SEM (JEOL JSM-6700F, Japan).

## Supporting figures

| <b>Table of Contents</b>                                                                         | <b>Pages</b> |
|--------------------------------------------------------------------------------------------------|--------------|
| Control study for nonspecific absorption of luminol-AuNPs labeled DNA signal probes in each step | 6            |
| Calibration curve of target ss-DNA                                                               | 7            |
| SEM images of the gold electrodes modified with different targets                                | 8-10         |

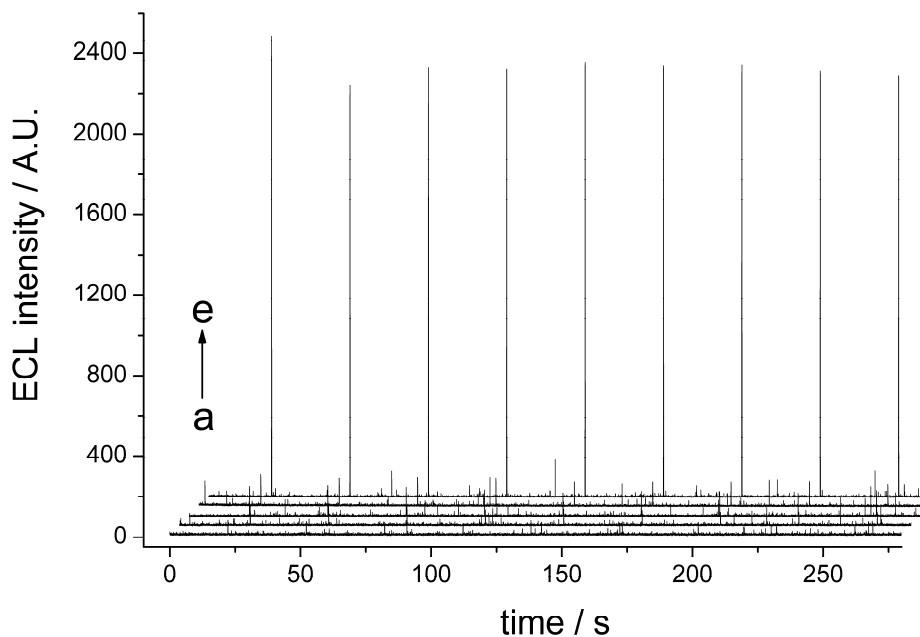

**Figure S1.** The control study for non-specific absorption of luminol-AuNPs labeled DNA signal probes in each step. ECL signals under pulse potential. Initial potential, 0 V; pulse period, 30 s; pulse time, 0.1 s; pulse potential, 0.8 V. ECL signals with non-specific absorption of luminol-AuNPs labeled DNA signal probes were obtained a ) on a bare gold electrode, b ) on a SA-coated AuNPs / 1,3-propanedithiol / gold electrode, c ) on a DNA capture probe / SA-coated AuNPs / 1,3-propanedithiol / gold electrode, d ) on a blank / DNA capture probe / SA-coated AuNPs / 1,3-propanedithiol / gold electrode, e) on a luminol-AuNPs labeled DNA signal probe / target ss-DNA ( $1 \times 10^{-12}$  M) / DNA capture probe / SA-coated AuNPs / 1,3-propanedithiol / gold electrode. All ECL signals were measured in 0.02 M CBS (pH 9.95) solution containing 1.0 mM  $H_2O_2$ .

It was observed from Figure S1a, S1b, S1c, S1d that almost no ECL signals were gained on bare gold electrode, SA-coated AuNPs / 1, 3-propanedithiol / gold electrode and DNA capture probe / SA-coated AuNPs / 1, 3-propanedithiol / gold electrode and these signals were the same as that gained from blank control experiment (no target ss-DNA). These results reveal that there is no nonspecific absorption of luminol-AuNPs labeled DNA signal probes in each step.

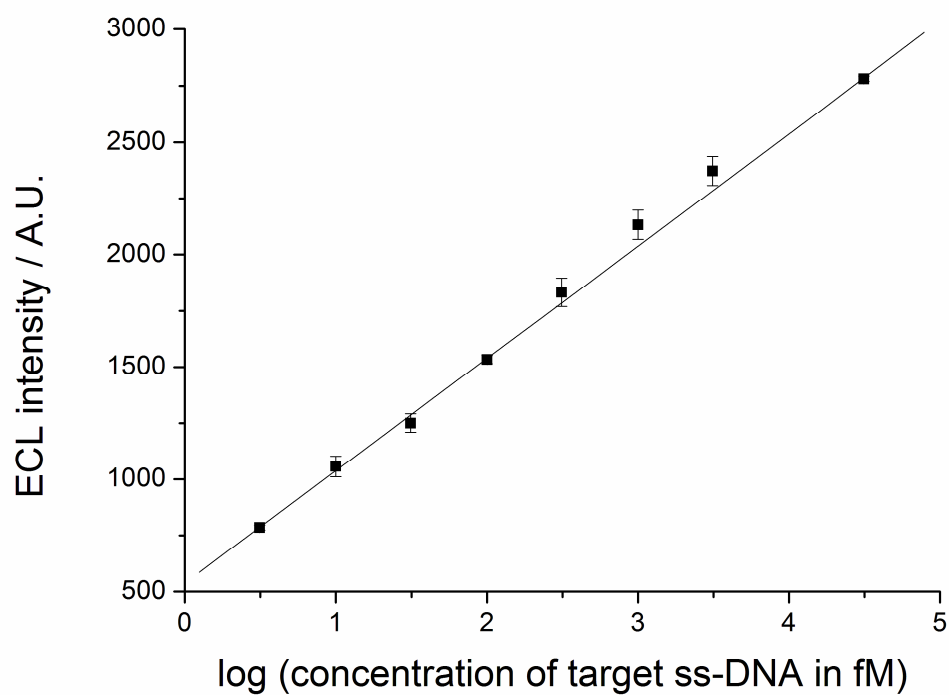

**Figure S2.** Calibration curve of target ss-DNA. Initial potential, 0 V; pulse period, 30 s; pulse time, 0.1 s; pulse potential, 0.8 V; H<sub>2</sub>O<sub>2</sub>, 1.0 mM; CBS, 0.02 M, pH 9.95; DNA capture probe,  $4 \times 10^{-6}$  M.

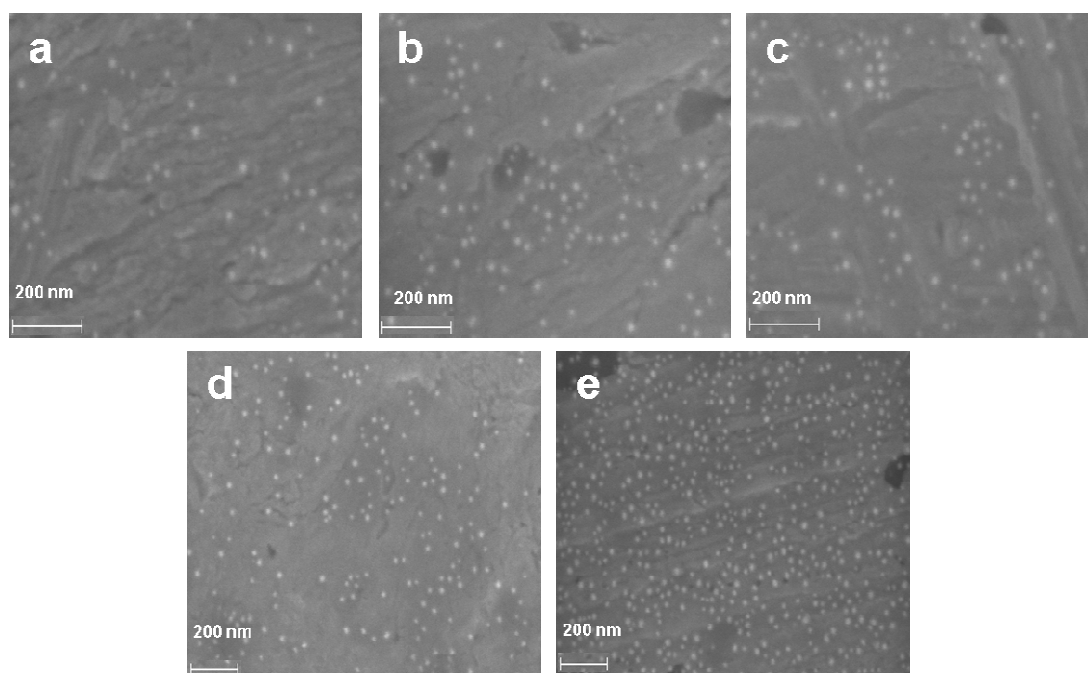

**Figure S3.** SEM images of gold electrodes modified with different targets in Tris-HCl buffer. a) blank; b) non-complementary sequence ( $1.0 \times 10^{-12}$  M); c) two-bases mismatched sequence ( $1.0 \times 10^{-12}$  M); d) one-base mismatched sequence ( $1.0 \times 10^{-12}$  M); e) target ss-DNA ( $1.0 \times 10^{-12}$  M); Other conditions are the same as Fig. 2.



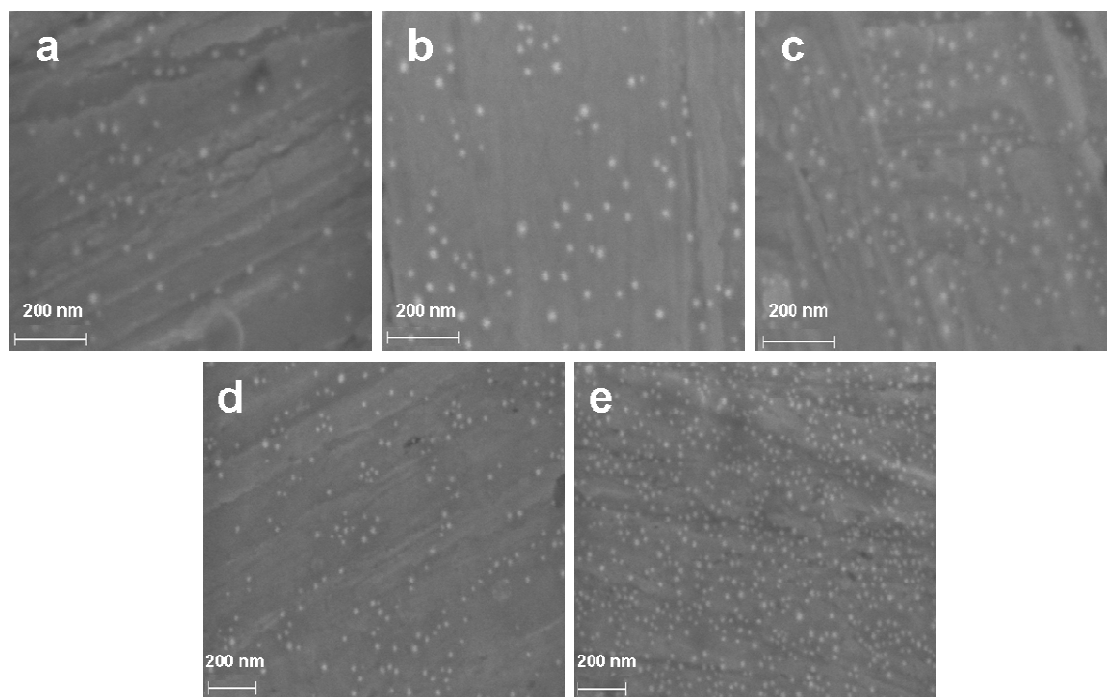

**Figure S4.** SEM images of gold electrodes modified with different targets in 50% serum sample 1. a) blank; b) non-complementary sequence ( $1.0 \times 10^{-12}$  M); c) two-bases mismatched sequence ( $1.0 \times 10^{-12}$  M); d) one-base mismatched sequence ( $1.0 \times 10^{-12}$  M); e) target ss-DNA ( $1.0 \times 10^{-12}$  M); Other conditions are the same as Fig. 2.

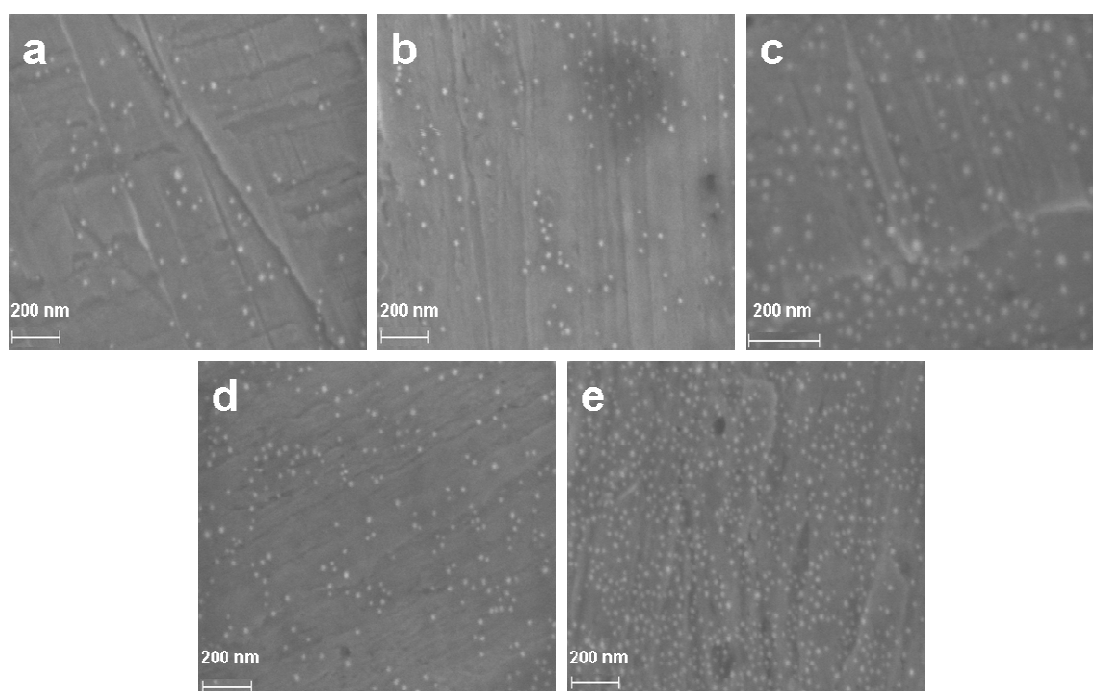

**Figure S5.** SEM images of gold electrodes modified with different targets in 50% serum sample 2. a) blank; b) non-complementary sequence ( $1.0 \times 10^{-12}$  M); c) two-bases mismatched sequence ( $1.0 \times 10^{-12}$  M); d) one-base mismatched sequence ( $1.0 \times 10^{-12}$  M); e) target ss-DNA ( $1.0 \times 10^{-12}$  M); Other conditions are the same as Fig. 2.
